# Supplementary material for: Turning a native or corroded Mg alloy surface into an anti-corrosion coating in excited CO2
Source: PubMed Central journal article supplement (PMC6170486; doi:10.1038/s41467-018-06433-5), 2018-10-03
Supplement: 41467_2018_6433_MOESM1_ESM.pdf [file 41467_2018_6433_MOESM1_ESM.pdf]

**Supplementary Information**  
**for**  
**Turning native or corroded Mg alloy surface into**  
**anti-corrosion coating in excited CO<sub>2</sub>**

*Wang et al.*

## Supplementary Figures

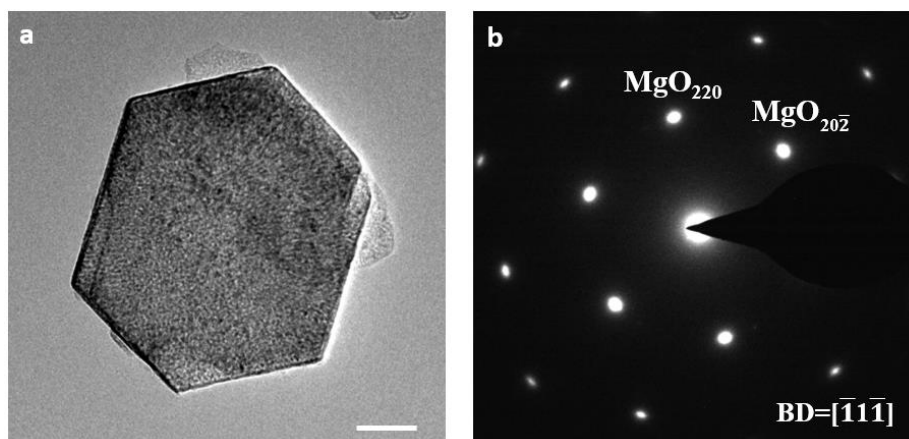

**Supplementary Figure 1 | TEM characterizations of the single-crystalline MgO lamella before exposure to CO<sub>2</sub>.** (a) TEM image of a single flake of MgO crystal with hexagonal morphology. (b) Electron diffraction pattern of the MgO in (a) shows that each lamella is single crystalline. Beam direction (BD) is  $[\bar{1}1\bar{1}]$ . Scale bar, 50 nm.

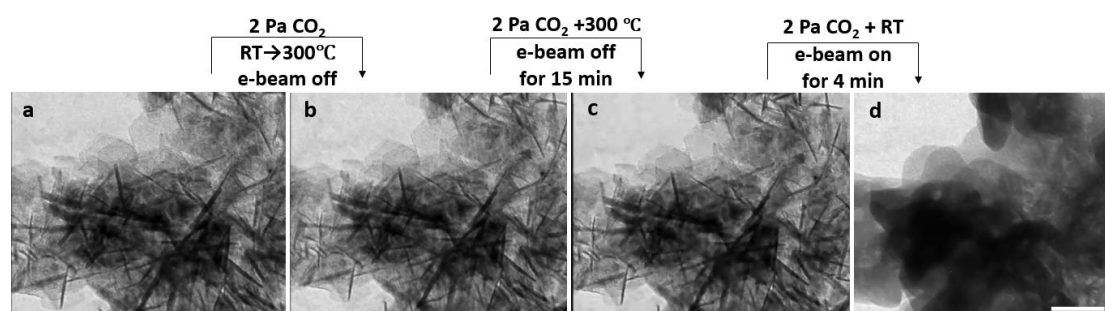

**Supplementary Figure 2 | Comparison of the heating and e-beam irradiation effects on the chemical reaction,  $\text{MgO} + \text{CO}_2 = \text{MgCO}_3$ .** (a) TEM image of MgO flakes before exposure in CO<sub>2</sub>. (b) Unchanged in 2 Pa CO<sub>2</sub> atmosphere without e-beam irradiation when the temperature increased from room temperature (RT) to 300°C. (c) The sample was held at 300°C for 15 min without e-beam irradiation, and it still kept the same morphology. After the sample was cooled down to RT and e-beam was on, MgO began to react with CO<sub>2</sub>. (d) The morphology of product after exposure to excited CO<sub>2</sub>\* after 4 min. Scale bar, 100 nm.

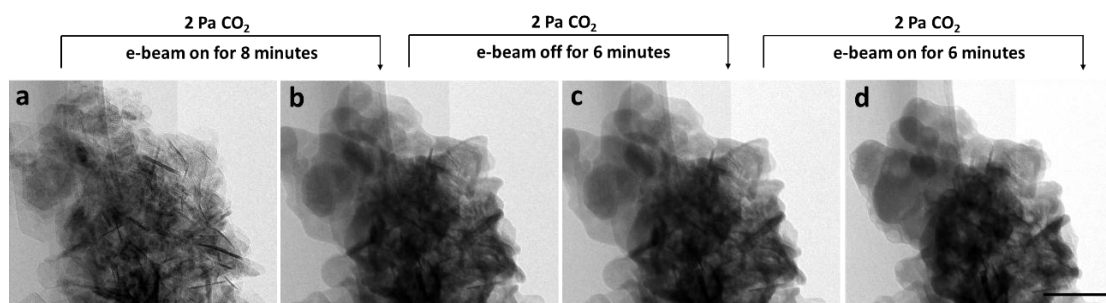

**Supplementary Figure 3 |** The reaction of MgO with excited  $\text{CO}_2^*$  shows no obvious “memory” effect for the prior electron beam irradiation. (a) The TEM bright field image of pristine MgO flakes. (b) The morphology of products after exposure in 2 Pa  $\text{CO}_2$  with the e-beam irradiation for 8 minutes. (c) The products kept unchanged in 2 Pa  $\text{CO}_2$  with the e-beam off for 6 minutes, indicating that prior e-beam irradiation effect disappears as soon as e-beam is discontinued. The reaction restarted again as soon as the e-beam was turned on. (d) The morphology of products after exposure in 2 Pa  $\text{CO}_2$  with the e-beam irradiation for additional 6 minutes. Scale bar, 200 nm.

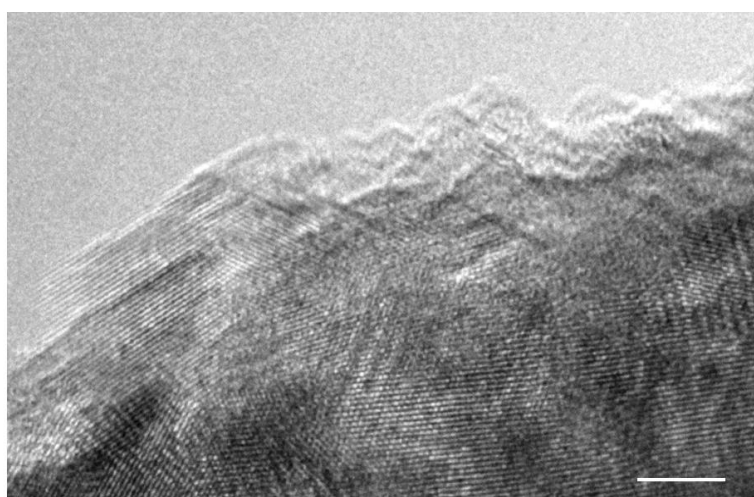

**Supplementary Figure 4 |** High-resolution TEM image of the surface layer after reaction. This is enlarged from the framed zone in Figure 2h. Different from the

reaction of excited CO<sub>2</sub> with pure MgO, the reaction with Mg metal underneath is moderate because of the reduced specific surface area of MgO that can be used for absorbing CO<sub>2</sub>. So, the slowly generated MgCO<sub>3</sub> has sufficient time to crystallize rather than forming amorphous. Scale bar, 10 nm.

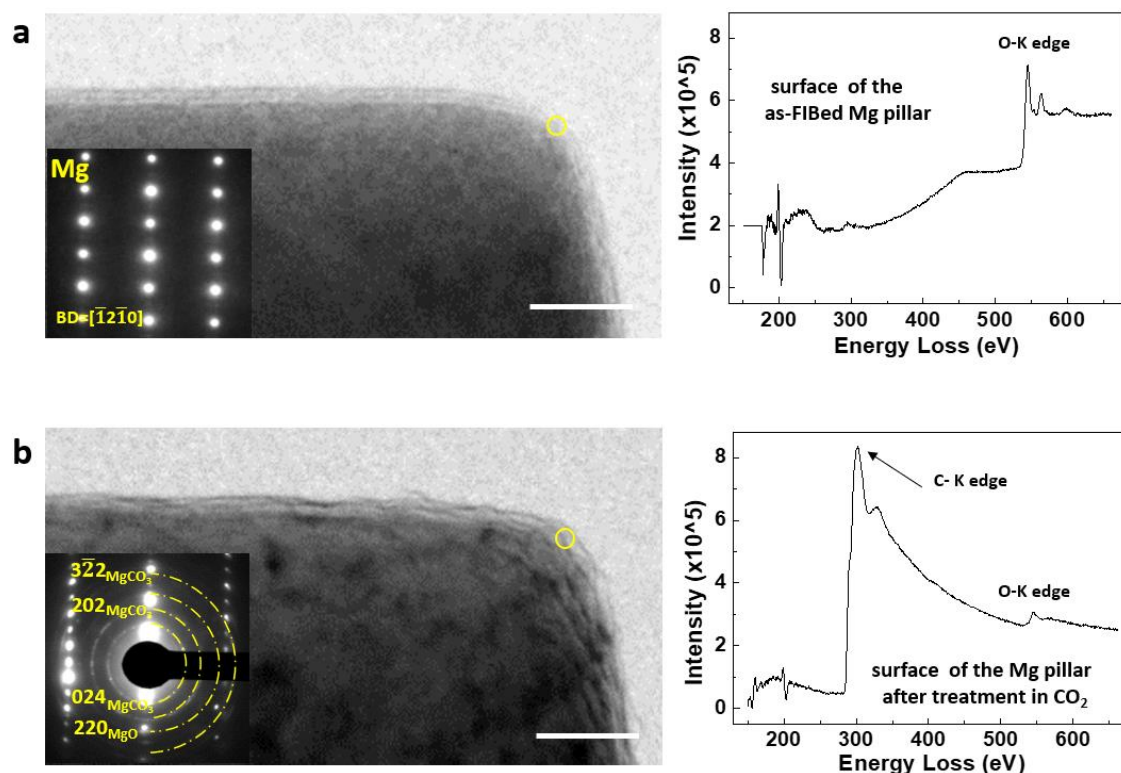

**Supplementary Figure 5 | TEM characterization and EELS analysis of the Mg pillar before and after exposure to excited CO<sub>2</sub>.** (a) Diffraction pattern of the as-FIBed Mg pillar with an amorphous MgO layer and the EELS spectrum of the surface zone in the yellow circle. (b) Extra diffraction rings from the newly-formed film after treatment in CO<sub>2</sub> show the existence of nanocrystalline MgO and MgCO<sub>3</sub>. Obvious C-K edge can be seen in the corresponding EELS spectrum. Beam direction (BD) is  $[\bar{1}2\bar{1}0]$ . Scale bars, 50 nm.

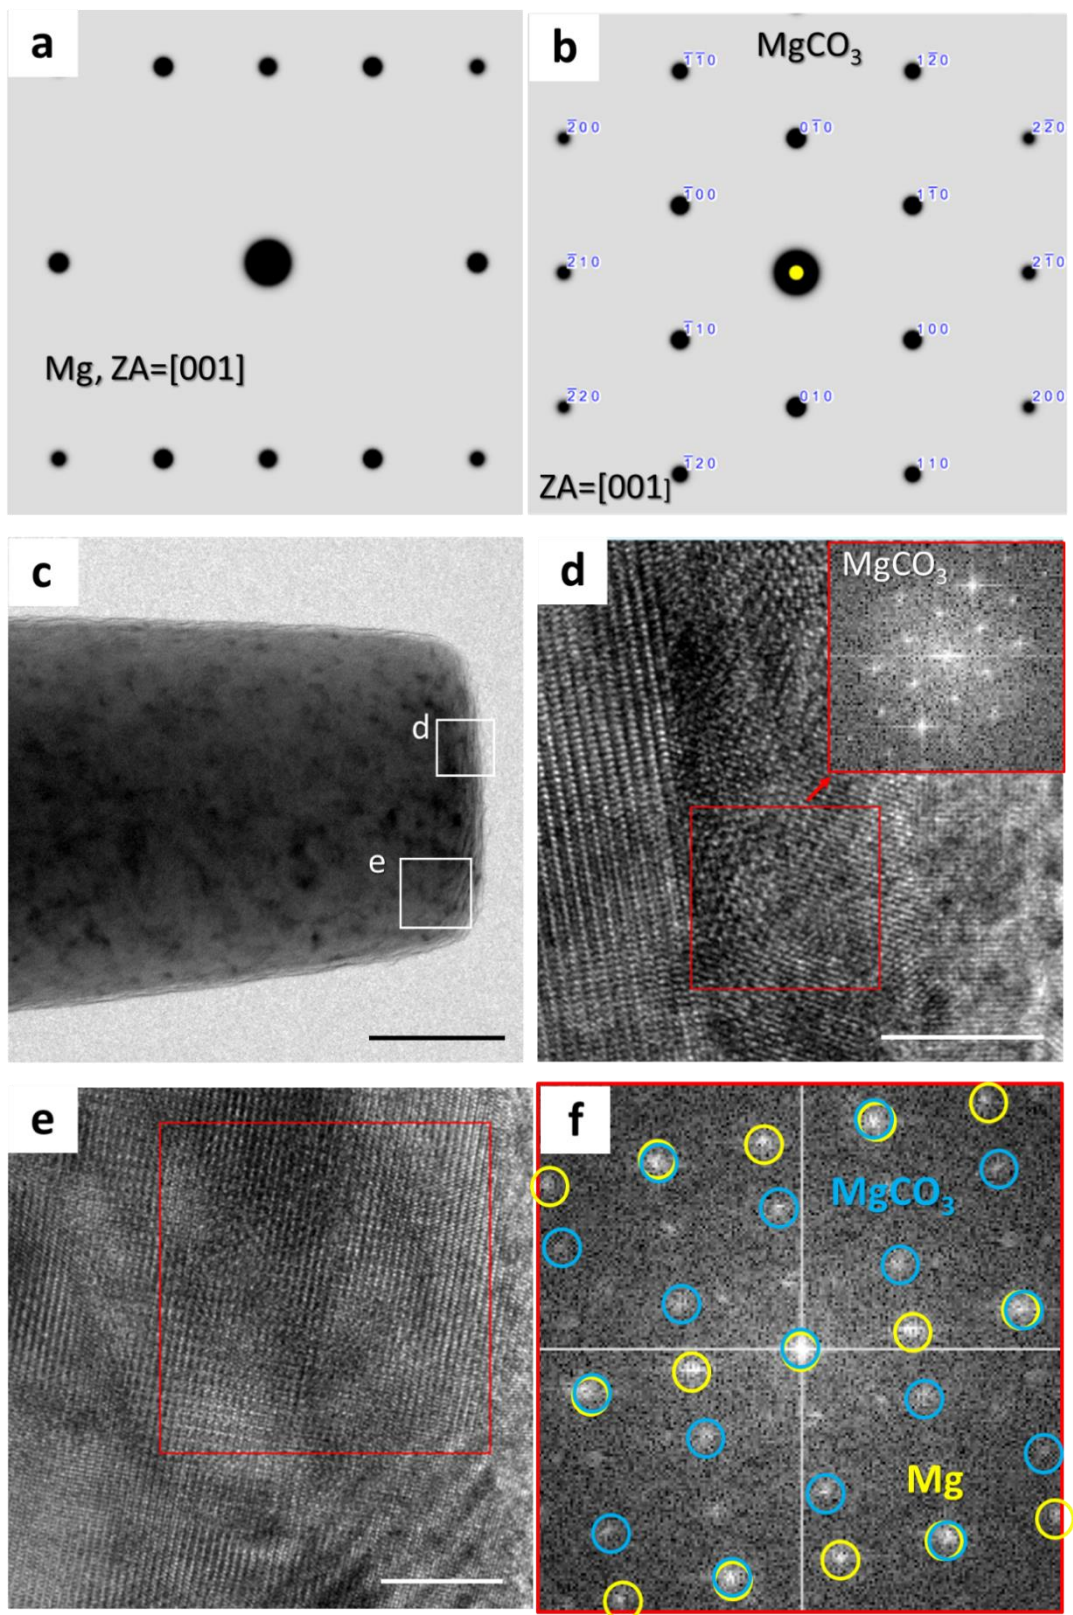

**Supplementary Figure 6 | High-resolution TEM characterizations and corresponding FFT of the surface layer after treatment in excited CO<sub>2</sub>. (a) Standard diffraction pattern of crystalline Mg with the [001] zone axis (ZA). (b)**

Standard diffraction pattern of crystalline  $\text{MgCO}_3$  with  $\text{ZA}=[001]$ . (c) Bright field TEM image of the Mg nanopillar after the reaction with the excited  $\text{CO}_2^*$ . (d) HRTEM image of the framed zone in (c), and the inset image is the corresponding FFT of the marked zone. The FFT coincides with the diffraction information of  $\text{MgCO}_3$  in (b), and this indicates this small area only contains crystalline  $\text{MgCO}_3$ . (e) HRTEM image of the framed zone in (c), and (f) is the corresponding FFT of the marked zone. The selected area is larger, so more information in reciprocal space can be seen: the spots circled in yellow come from monocrystalline Mg substrate, and the spots circles in blue are from crystalline  $\text{MgCO}_3$ ; other unmarked dispersed spots are due to unreacted and crystallized oxide. Scale bars: (c) 50 nm, (d), (e) 10 nm.

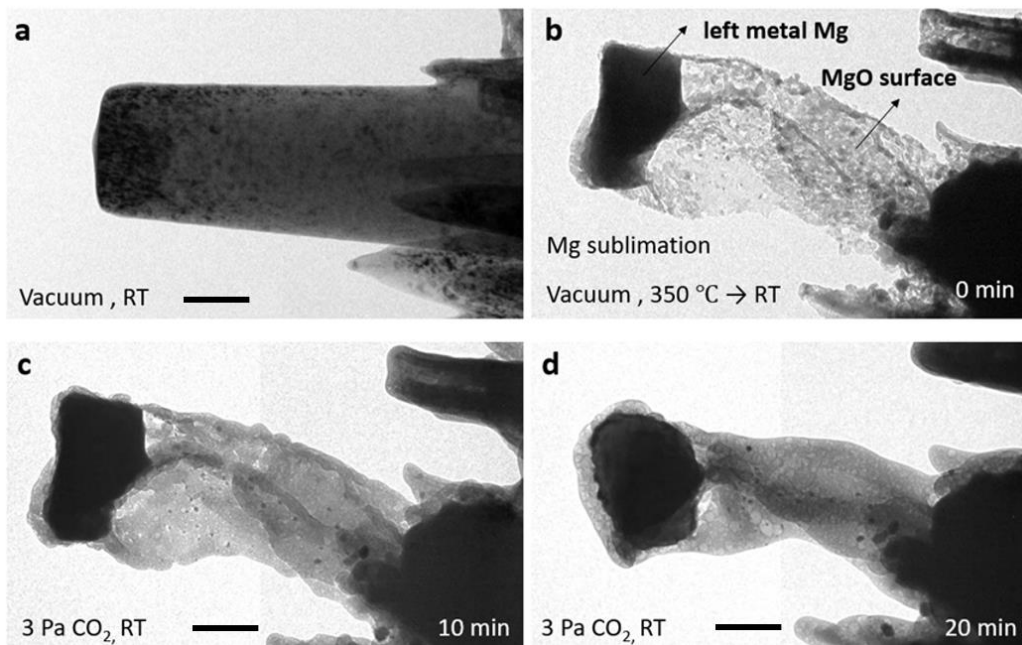

**Supplementary Figure 7** | Reaction of the oxide shell of Mg pillar with  $\text{CO}_2$  under the irradiation of e-beam. (a) Bright-field TEM image of the original FIBed Mg pillar. (b) Heated to  $380^\circ\text{C}$  in vacuum, most of the Mg metal sublimated away; after cooled to room temperature (RT), the MgO shell was left. (c) and (d) reaction of the MgO shell with 3 Pa  $\text{CO}_2$  under e-beam irradiation at RT. The reaction phenomenon is almost the same as that in Fig. 1. Scale bars, 100 nm.

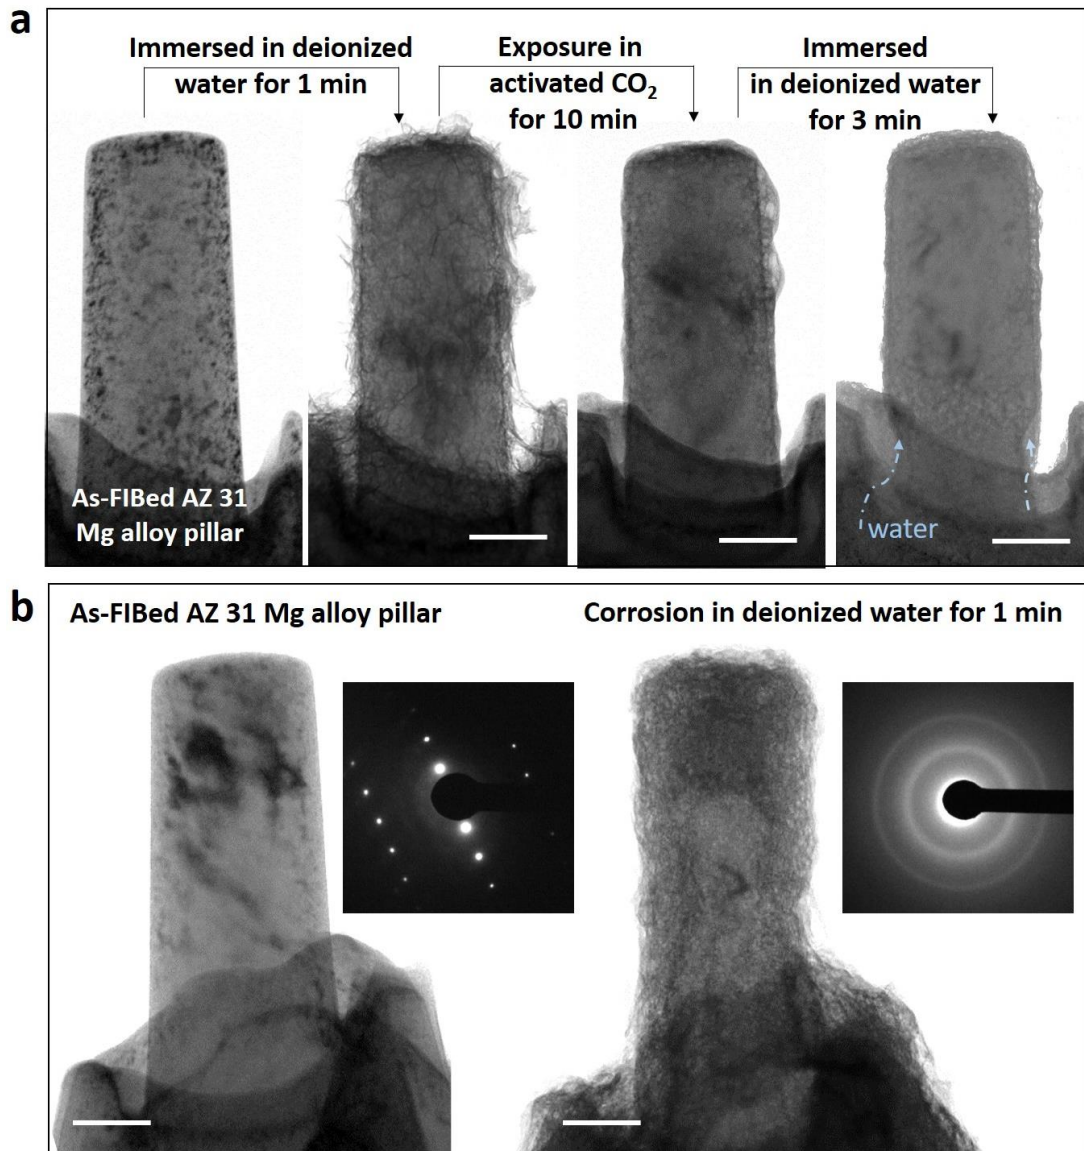

**Supplementary Figure 8 | Comparison of the corrosion resistance of the as-FIBed AZ 31 Mg alloy pillars and those treated in CO<sub>2</sub>.** (a) Mitigation of corrosion on AZ 31 Mg alloy via reaction of the pre-corrosion product on surface with excited CO<sub>2</sub>. After immersion in deionized water for 1 minute, the homogeneous corrosion product-fluffy Mg(OH)<sub>2</sub> (MgO) film grew on the FIB-fabricated pillar's surface. After exposed in the CO<sub>2</sub> atmosphere for 10 minutes, the formed fluid-like MgCO<sub>3</sub> covered the pillar. After immersion in deionized water for 3 min again, most of the pillar kept undamaged except for the bottom part which was not protected. Water

attacked the metal from the interior of pillar's bottom. **(b)** For comparison, the untreated AZ 31 Mg alloy pillar suffered very serious corrosion after immersion in water for only 1 minute. Scale bars, 100 nm.

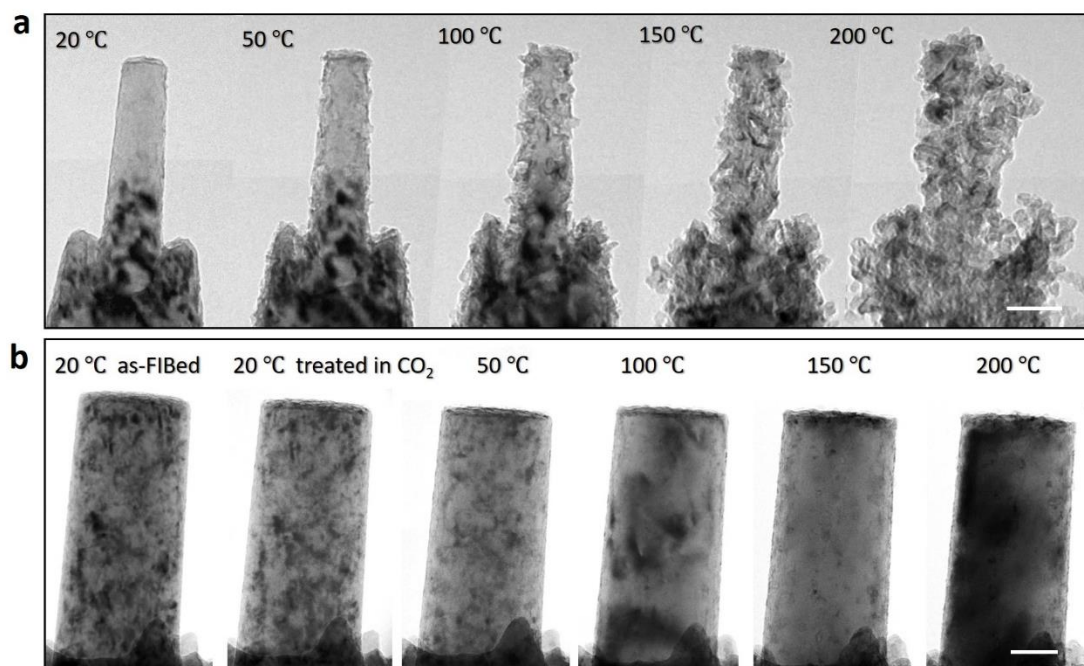

**Supplementary Figure 9 | Comparison of the high temperature oxidation of the Mg pillars with and without MgCO<sub>3</sub> protective film. (a)** Real-time oxidation process of the as-FIBed pure Mg nanopillar with the increasing temperature from 20 °C to 200 °C in 2 Pa O<sub>2</sub> gas. **(b)** Real-time heating process of the Mg nanopillar with MgCO<sub>3</sub> protective film with the increasing temperature from 20 °C to 200 °C in 2 Pa O<sub>2</sub>. Scale bars: **(a)** 100 nm, **(b)** 50 nm.



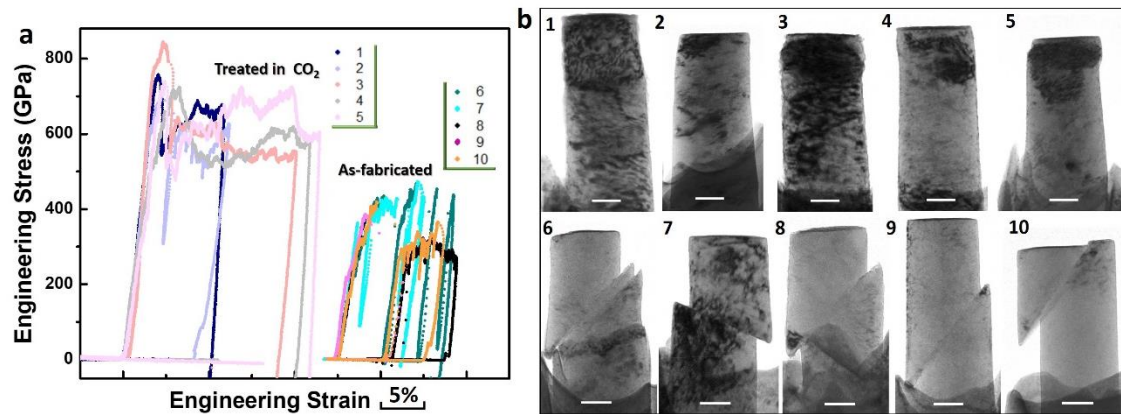

**Supplementary Figure 10 | Comparison of the mechanical behaviors of the as-FIBed and the treated Mg pillars. (a)** Compressive engineering stress-strain curves for the Mg pillars with protective film (number 1,2,3,4,5) and the as-fabricated Mg pillars (number 6,7,8,9,10). The ten Mg pillars are single crystalline with different orientation. And the compressive directions from 1 to 10 is  $[10\bar{1}2]$ ,  $[\bar{1}100]$ ,  $[\bar{1}100]$ ,  $[23\bar{1}\bar{6}\bar{7}3]$ ,  $[5\bar{1}\bar{4}0]$ ,  $[\bar{1}100]$ ,  $[\bar{1}100]$ ,  $[70\bar{7}9]$ ,  $[70\bar{7}9]$ , and  $[70\bar{7}9]$ , respectively. The ten pillars are corresponding to what in Figure 5c. **(b)** The morphologies of the ten compressed Mg pillars. The untreated sample showed obvious shearing steps on the surfaces after compression, and the pillars with  $\text{MgCO}_3$  film had a homogeneous deformation morphology with significant dislocation storage observed inside the pillars. Scale bars, 100 nm.

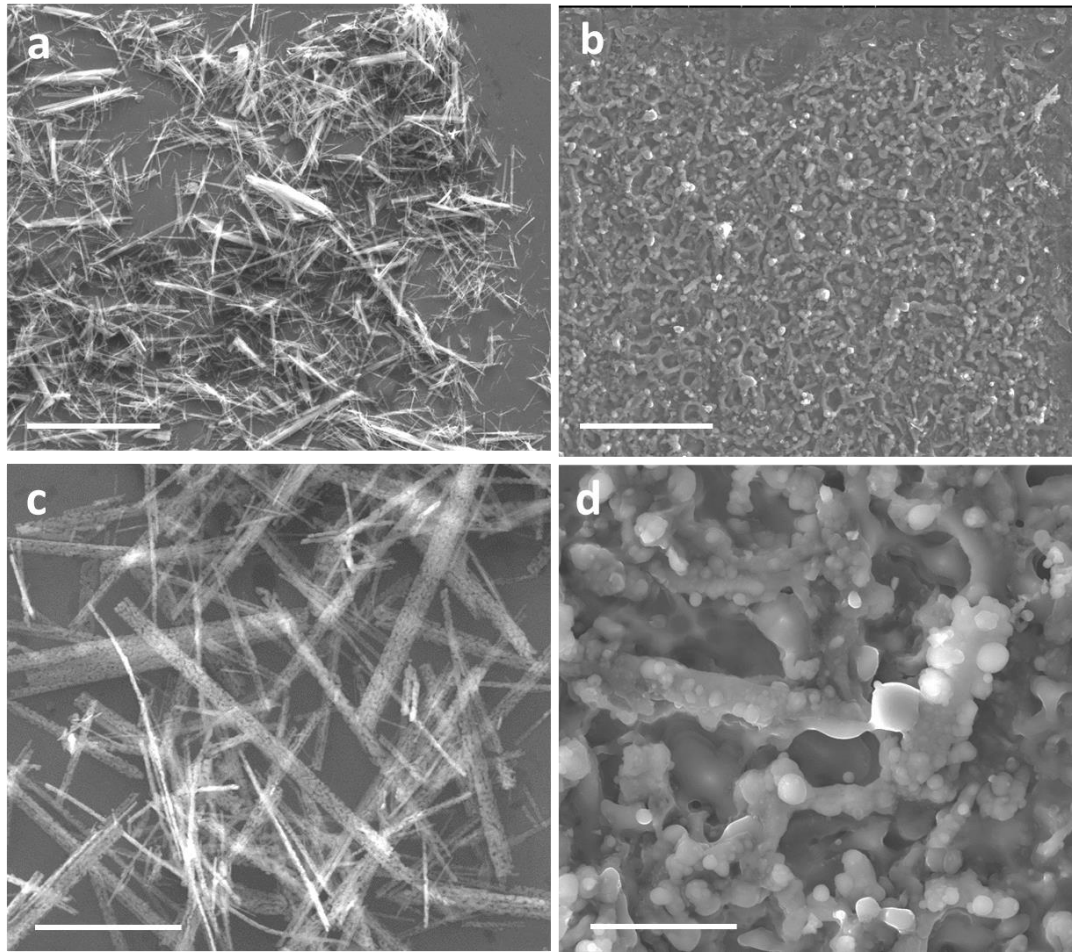

**Supplementary Figure 11 | Reaction of the MgO nanorods dispersed on Si wafers with low temperature CO<sub>2</sub> plasma and formation of the fluid-like MgCO<sub>3</sub> similar with what produced in E-TEM. (a)** Overall SEM image of the MgO nanorods (synthesized by hydrothermal method) dispersed on the Si wafer. **(b)** SEM image of the MgO rods in (a) after reaction in CO<sub>2</sub> plasma for 1 hour (200 Pa CO<sub>2</sub> atmosphere). Magnified SEM image of the MgO rods before **(c)** and after **(d)** treatment in CO<sub>2</sub> plasma. The final production shows the fluid-like morphology, like that formed in E-TEM experiments. The generated MgCO<sub>3</sub> can flow slowly and spread on the Si wafer uniformly. Scale bars: **(a), (b)** 50  $\mu\text{m}$ , **(c), (d)** 10  $\mu\text{m}$ .

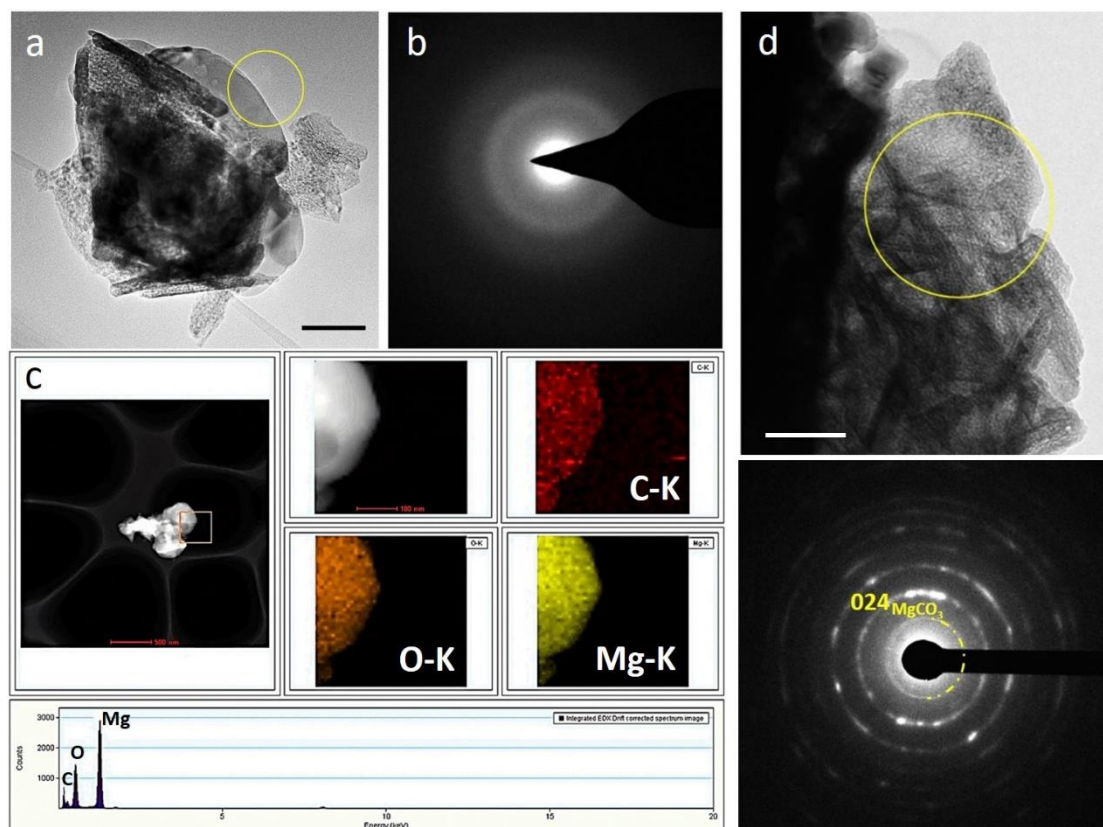

**Supplementary Figure 12 | TEM characterization and element analysis of the MgO powders after plasma treatment.** (a) TEM image of the aggregated MgO flakes after reaction with CO<sub>2</sub> plasma for 30 minutes (200 Pa CO<sub>2</sub>). The reaction product was amorphous, as evidenced by the selected area diffraction halo in (b). (c) Elements analysis of the framed region. Energy Dispersive Spectrometer (EDS) mapping show the existence of Mg, O and C, further proving that the reaction product is MgCO<sub>3</sub>. (d) TEM image of the aggregated MgO flakes after reaction with CO<sub>2</sub> plasma for 30 minutes (20 Pa CO<sub>2</sub>). Different from what in (a), the formed MgCO<sub>3</sub> is nanocrystalline (as marked in the SAED, 024 is the characteristic diffraction ring of MgCO<sub>3</sub>). Presumably, the lower CO<sub>2</sub> pressure decreases the reaction rate, which can favor the formation of nanocrystalline MgCO<sub>3</sub>. Scale bars: (a) 50 nm, (d) 100 nm.

## Supplementary Note 1

### Treatment of the corroded bulk pure Mg in CO<sub>2</sub> plasma and potentiodynamic polarization measurements

Firstly, we immersed the bulk pure Mg (99.95 wt.%) samples in deionized water for 24 hours at room temperature (25 °C) to pre-corrode the surface and obtain fluffy Mg(OH)<sub>2</sub> & MgO. After immersion, this film was found to contain a top layer of crystalline MgO embedded in an amorphous Mg(OH)<sub>2</sub> matrix<sup>1</sup> with an overall plate-like morphology (Supplementary Figure 13b). And then, the immersed samples were put inside a lab-made glow discharge chamber to react with CO<sub>2</sub> plasma for 1 hour. The corroded surface with plate-like morphology was carbonated resulting in a relatively flat and dense MgCO<sub>3</sub> surface (Supplementary Figure 13c). Anti-corrosion properties of the formed MgCO<sub>3</sub> protective films were subsequently evaluated by using potentiodynamic polarization measurements in 3.5% NaCl solution. After immersion in deionized water for 24 h and treatment in CO<sub>2</sub> plasma for 1 h, the sample's corrosion potential  $E_{\text{corr}}$  increased slightly and corrosion current density  $i_{\text{corr}}$  (the corrosion rate) obviously decreased, by comparing with the pristine and only immersed Mg samples (see polarization curves in Supplementary Figure 13e and Supplementary Table 1). However, from the SEM characterization of the sample after electrochemical test, we can see the top surface MgCO<sub>3</sub> film was corroded, and the plate-like MgO and Mg(OH)<sub>2</sub> underneath was exposed (Supplementary Figure 13c), which suggested that the formed MgCO<sub>3</sub> in 1-hour plasma treatment is too thin to protect the substrate from electrochemical corrosion. Therefore, we further increased the plasma treatment time to 2 hours after immersion in deionized water for 24 hours so as to form a thicker enough MgCO<sub>3</sub> protective film. 2-hours plasma treatment made  $E_{\text{corr vs.SCE}}$  of Mg samples increase from -1.58 V to -1 V~ -0.73 V, and  $i_{\text{corr}}$  decrease by two orders of magnitude; after electrochemical tests, surfaces of samples kept intact and no obvious cracks on them were detected in SEM (Supplementary Figure 13d). Table S1 compares the anti-corrosion properties of MgCO<sub>3</sub> with other protective coatings formed by anodization or micro-arc oxidation. We can see that anti-corrosion effects of MgCO<sub>3</sub>

are better than the anodized coating, and even comparable with the composite coatings obtained by micro-arc oxidations.

These potentiodynamic polarization tests have proved the superior corrosion resistance of bulk Mg samples with protective  $\text{MgCO}_3$  film in aqueous environment. Certainly, in order to obtain the optimized anti-corrosion properties of  $\text{MgCO}_3$ , more experiments should be done to obtain the optimal immersion time and plasma treatment time.

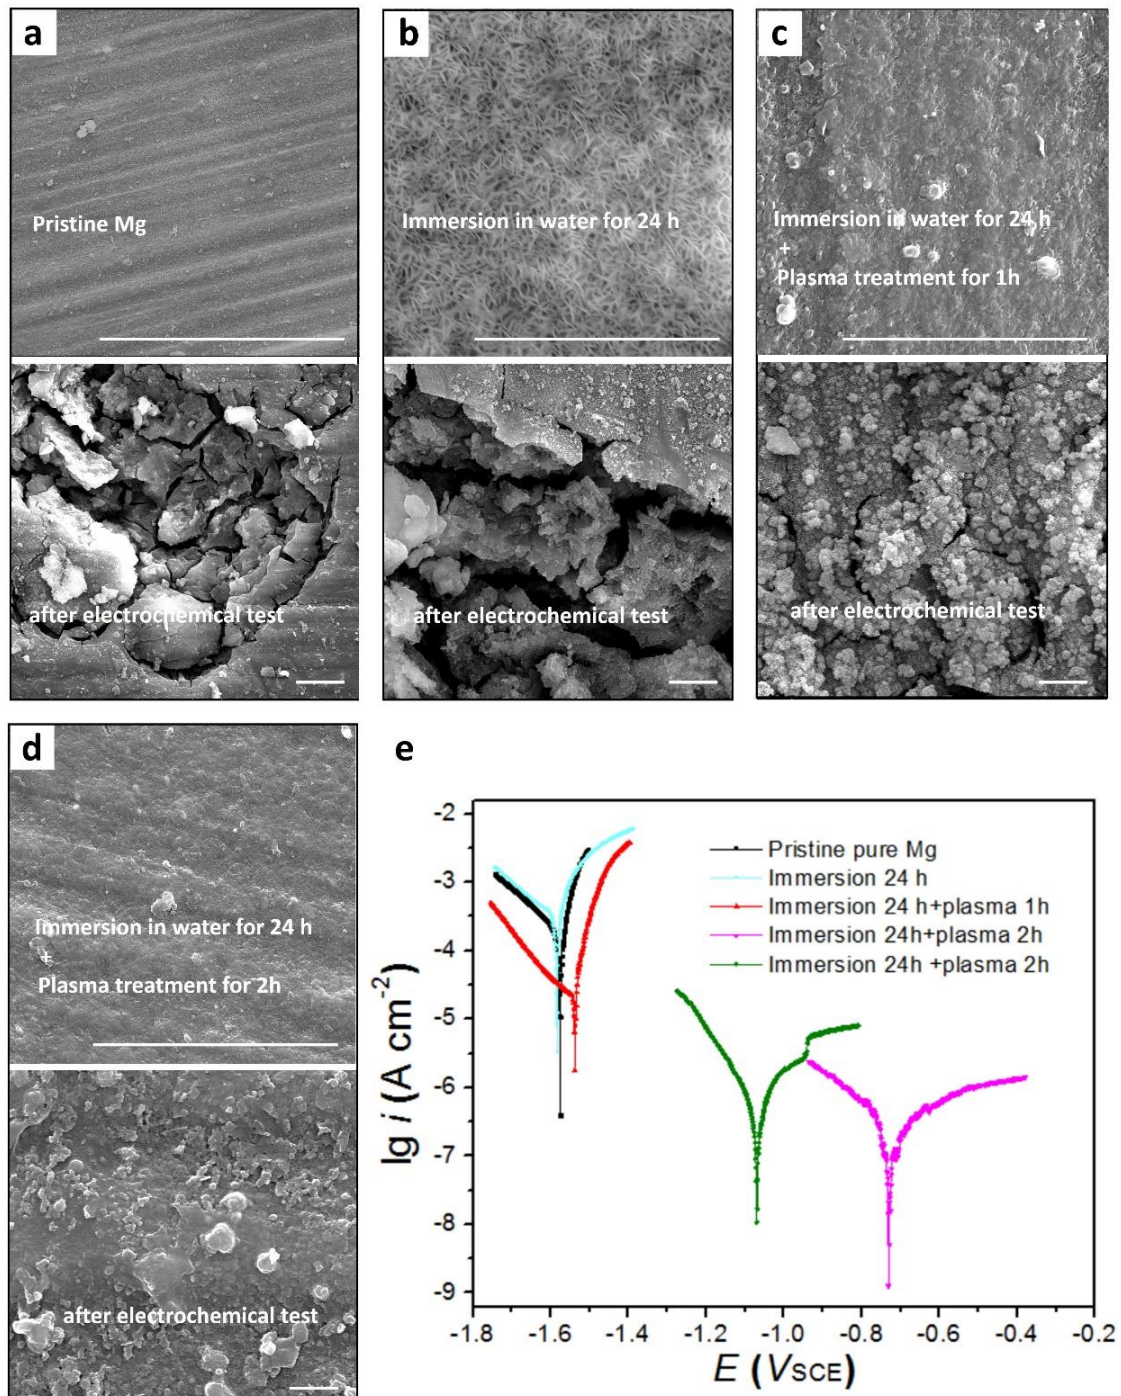

**Supplementary Figure 13 | Anti-corrosion effects of MgCO<sub>3</sub> protective film on bulk Mg.** Typical SEM images of the Mg samples before and after potentiodynamic polarization tests: **(a)** pristine pure Mg sample without any treatments; **(b)** pure Mg sample immersed in deionized water for 24 h; **(c)** the pure Mg sample immersed in deionized water for 24 h and then treated in CO<sub>2</sub> plasma for 1 h; **(d)** pure Mg sample immersed in deionized water for 24 h and then treated in CO<sub>2</sub> plasma for 2 h. **(e)** corresponding potentiodynamic polarization curves of above-mentioned Mg samples. Scale bars, 5 μm.

### Supplementary Table 1

**The results of potentiodynamic corrosion tests in 3.5 wt.% NaCl solution and comparisons with anodizing and micro-arc treatment.**

| Samples                                               | $E_{\text{cor}}$ (V <sub>SCE</sub> ) | $i_{\text{cor}}$ (μA/cm <sup>2</sup> ) |
|-------------------------------------------------------|--------------------------------------|----------------------------------------|
| Pristine Mg                                           | -1.58                                | 196.64                                 |
| Immersion 24h                                         | -1.59                                | 251.28                                 |
| Immersion 24h+plasma 1h                               | -1.54                                | 19.52                                  |
| Immersion 24h+plasma 2h                               | -1.06                                | 0.31                                   |
| Immersion 24h+plasma 2h                               | -0.73                                | 0.22                                   |
| Anodizing coating <sup>2</sup>                        | -1.48                                | 27                                     |
| Composite coating by micro-arc oxidation <sup>3</sup> | -1.49                                | 0.69                                   |
| Micro-arc oxidation coating <sup>4</sup>              | -1.69                                | 0.17                                   |

### Supplementary References

1. Nordlien, J., Ono, S., Masuko, N. & Nisancioglu, K. A TEM investigation of naturally formed oxide films on pure magnesium. *Corros. Sci.* **39**, 1397-1414 (1997).
2. Xue, D., Yun, Y., Schulz, M. J. & Shanov, V. Corrosion protection of biodegradable magnesium implants using anodization. *Mater. Sci. Eng. C* **31**, 215-223 (2011).
3. Mu, W. & Han, Y. Characterization and properties of the MgF<sub>2</sub>/ZrO<sub>2</sub> composite coatings on magnesium prepared by micro-arc oxidation. *Surf. Coat. Tech.* **202**, 4278-4284 (2008).
4. Zhao, L., Cui, C., Wang, Q. & Bu, S. Growth characteristics and corrosion resistance of micro-arc oxidation coating on pure magnesium for biomedical applications. *Corros. Sci.* **52**, 2228-2234 (2010).
